# Supplementary material for: Metabolic Profile and Quantification of Terpene Trilactones and Flavonoids in Ginkgo biloba L. Buds Depending on Physiological Stages
Source: MDPI journal article supplement (doi:10.3390/nutraceuticals3010014), 2023-03-10
Supplement: s1 [file s1]

# Supplementary Materials: Metabolic Profile and Quantification of Terpene Trilactones and Flavonoids in *Ginkgo biloba* L. Buds Depending on Physiological Stages

Dominique Laurain-Mattar <sup>1,2,\*,+</sup>, Sahar Saliba <sup>2</sup>, Joseph Mattar <sup>3</sup>, Afra Khiralla <sup>4</sup>, Rosella Spina <sup>1,2</sup> and Dominique Decolin <sup>5</sup>

<sup>1</sup> Université de Lorraine—INRAE, LAE, F-54000 Nancy, France

<sup>2</sup> Université de Lorraine—CNRS, L2CM, F-54000 Nancy, France

<sup>3</sup> CRICES Centre de recherche de l'ICES, Institut Catholique de Vendée, 17 Boulevard des Belges, F-85017 La Roche-sur-Yon, France

<sup>4</sup> Botany Department, Faculty of Sciences and Technologies, Shendi University, Shendi P.O. Box 142, Sudan

<sup>5</sup> Faculté de Pharmacie, Université de Lorraine, Campus Brabois-Santé, 7 Avenue de la Forêt de Haye, BP 90170, F-54505 Vandoeuvre-lès-Nancy, France

\* Correspondence: dominique.mattar@univ-lorraine.fr

+ Current address: Université de Lorraine, Laboratoire LAE\_UMR1121, F-54506 Vandoeuvre-lès-Nancy, France.

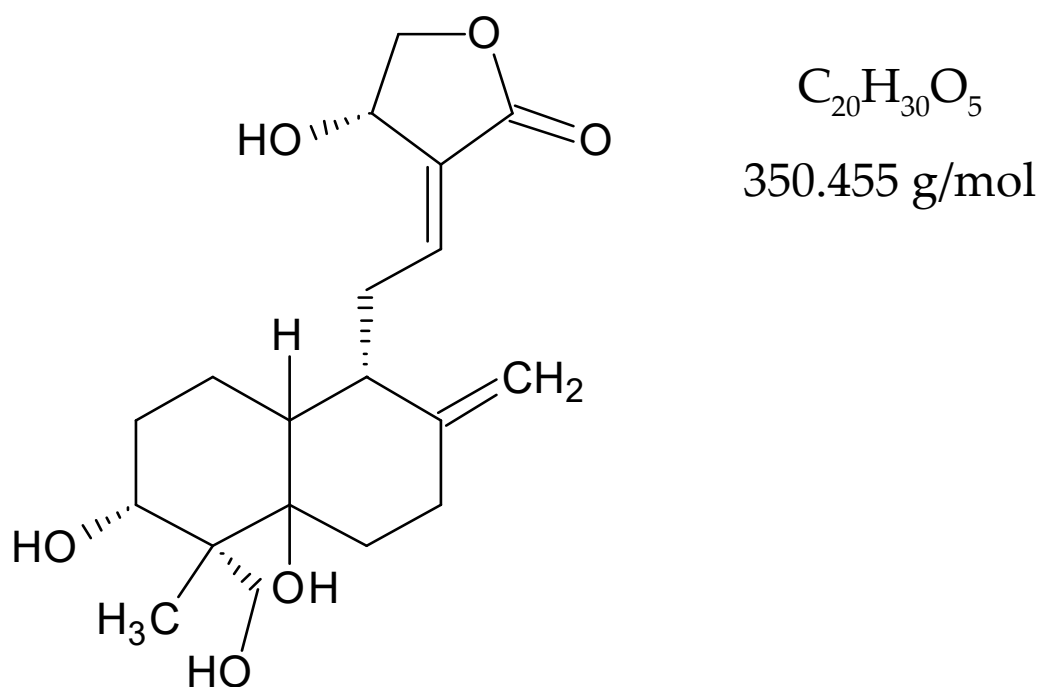

**Figure S1.** Chemical structure of andrographolide.

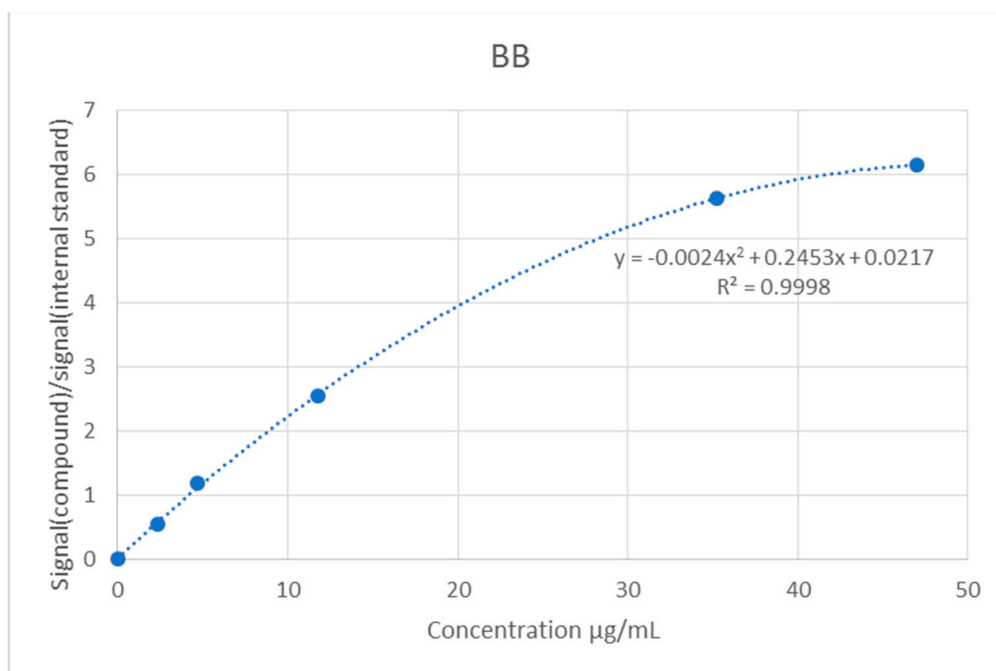

**Figure S2.** Calibration curve for Bilobalide (BB) quantification.

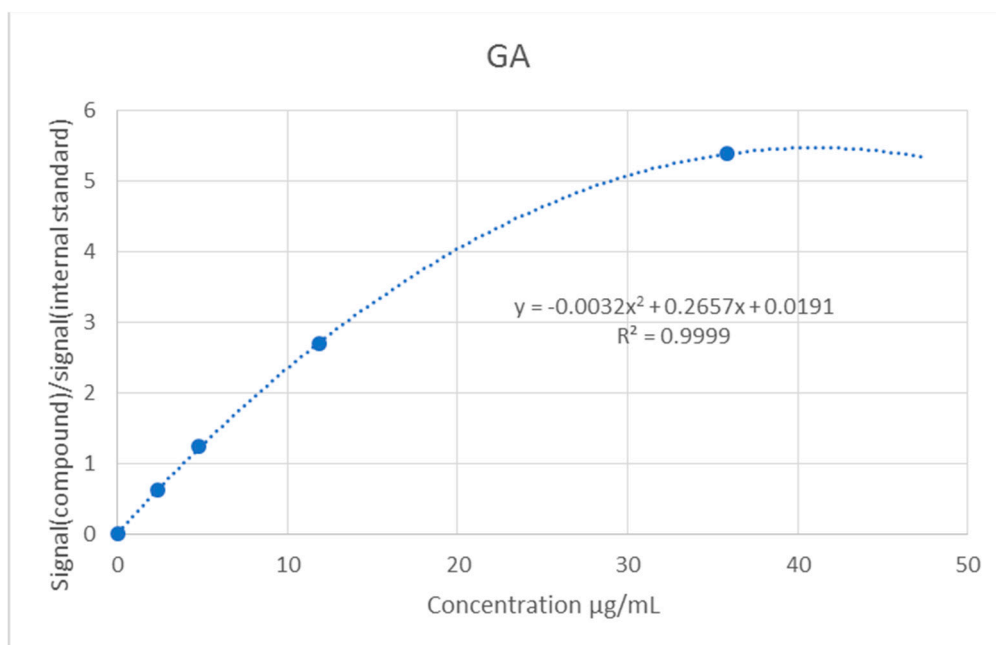

**Figure S3.** Calibration curve for Ginkgolide A (GA) quantification.

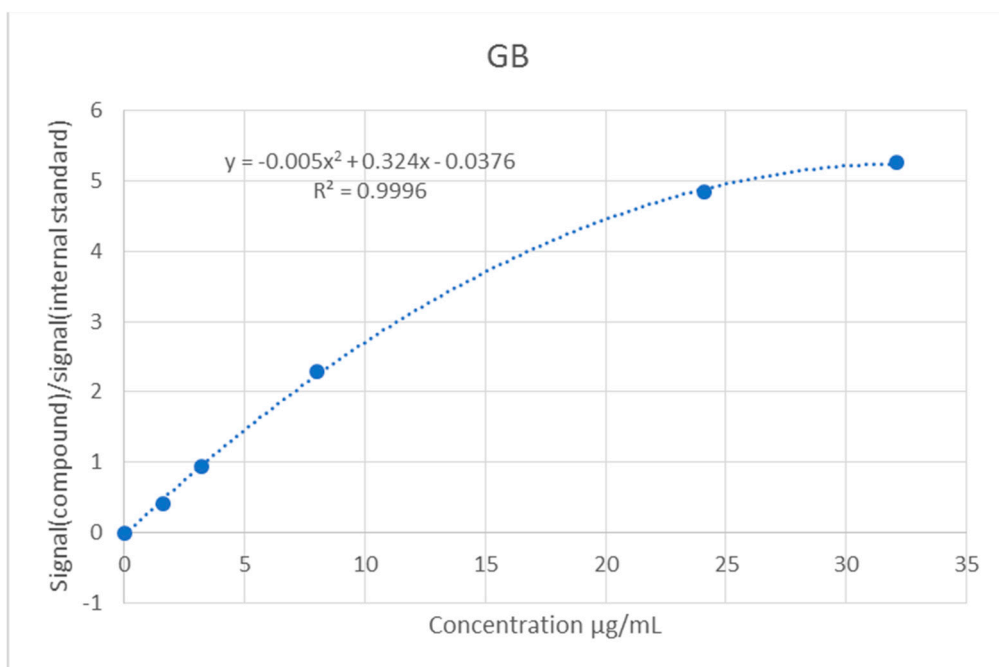

**Figure S4.** Calibration curve for Ginkgolide B (GB) quantification.

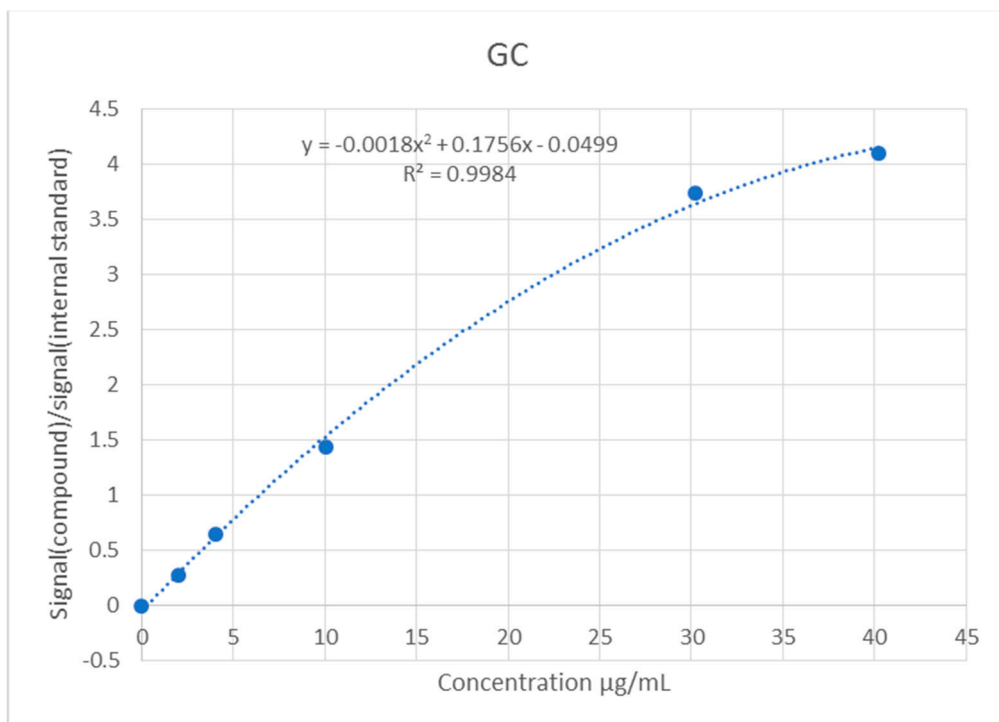

**Figure S5.** Calibration curve for Ginkgolide C (GC) quantification.

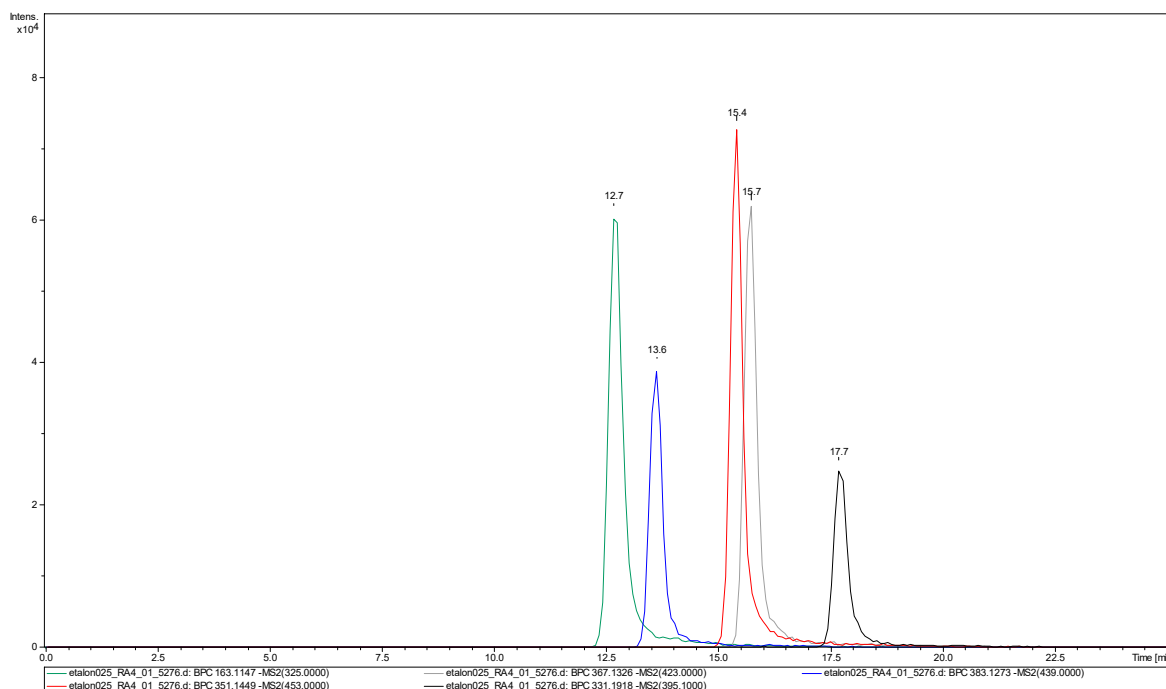

**Figure S6.** LC-HR-ESI-MS chromatogram for standards reference in a fortified mixture.

Bilobalide (12.7 min), ginkgolide C (13.6 min), ginkgolide A (15.4 min), ginkgolide B (15.7 min) and andrographolide (17.7 min).

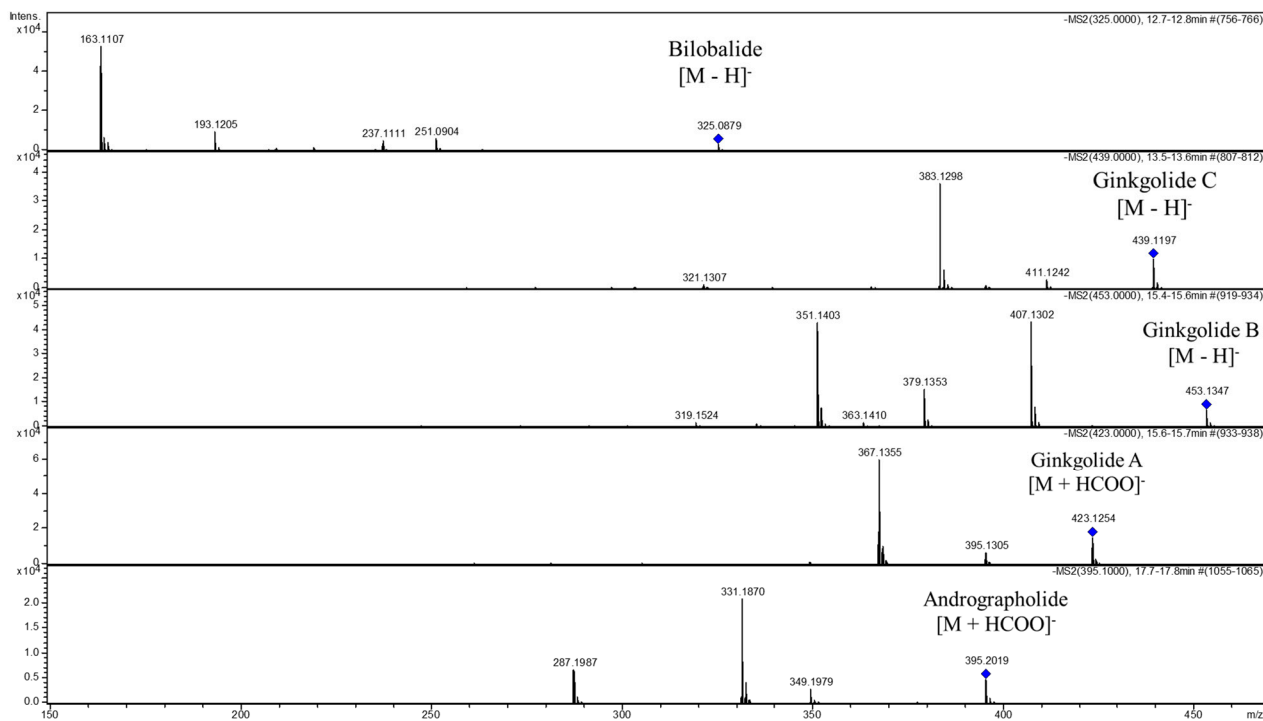

**Figure S7.** ESI-MS ionization patterns of terpene trilactones: bilobalide, ginkgolide A, ginkgolide B, ginkgolide C and a reference standard, andrographolide.
